# Supplementary material for: Significant impacts of the COVID-19 pandemic on race/ethnic differences in US mortality
Source: PubMed Central journal article supplement (PMC9436308; doi:10.1073/pnas.2205813119), 2022-08-23

**Supplementary material for the paper: Significant impacts of the COVID-19 pandemic on race/ethnic differences in USA mortality**

**Authors:** José Manuel Aburto<sup>1,2,3,\*</sup> Andrea M. Tilstra<sup>1,2,4\*</sup>, Ginevra Floridi<sup>1,2</sup>, Jennifer B. Dowd<sup>1,2</sup>

**Affiliations:**

<sup>1</sup>Leverhulme Centre for Demographic Science and Department of Sociology, University of Oxford; 42-43 Park End Street, Oxford, OX1 1JD, UK.

<sup>2</sup>Nuffield College; New Rd, Oxford, OX1 1NF, UK.

<sup>3</sup>Interdisciplinary Centre on Population Dynamics, University of Southern Denmark; Odense 5000, Denmark.

<sup>4</sup> University of Colorado Population Center, Institute of Behavioral Science, University of Colorado Boulder, Boulder, CO, USA

\*Corresponding authors: JMA ([jose-manuel.aburto@sociology.ox.ac.uk](mailto:jose-manuel.aburto@sociology.ox.ac.uk)), AMT ([andrea.tilstra@sociology.ox.ac.uk](mailto:andrea.tilstra@sociology.ox.ac.uk))

**Classification:** Social sciences, Demography

**Keywords:** COVID-19; demography; life expectancy; life span inequality; years of life lost

## Supplementary Information

Figure S1. Contributions by age groups and causes of death to changes in life expectancy in 2010-2019 and 2019-2020 by racial/ethnic groups and sex.

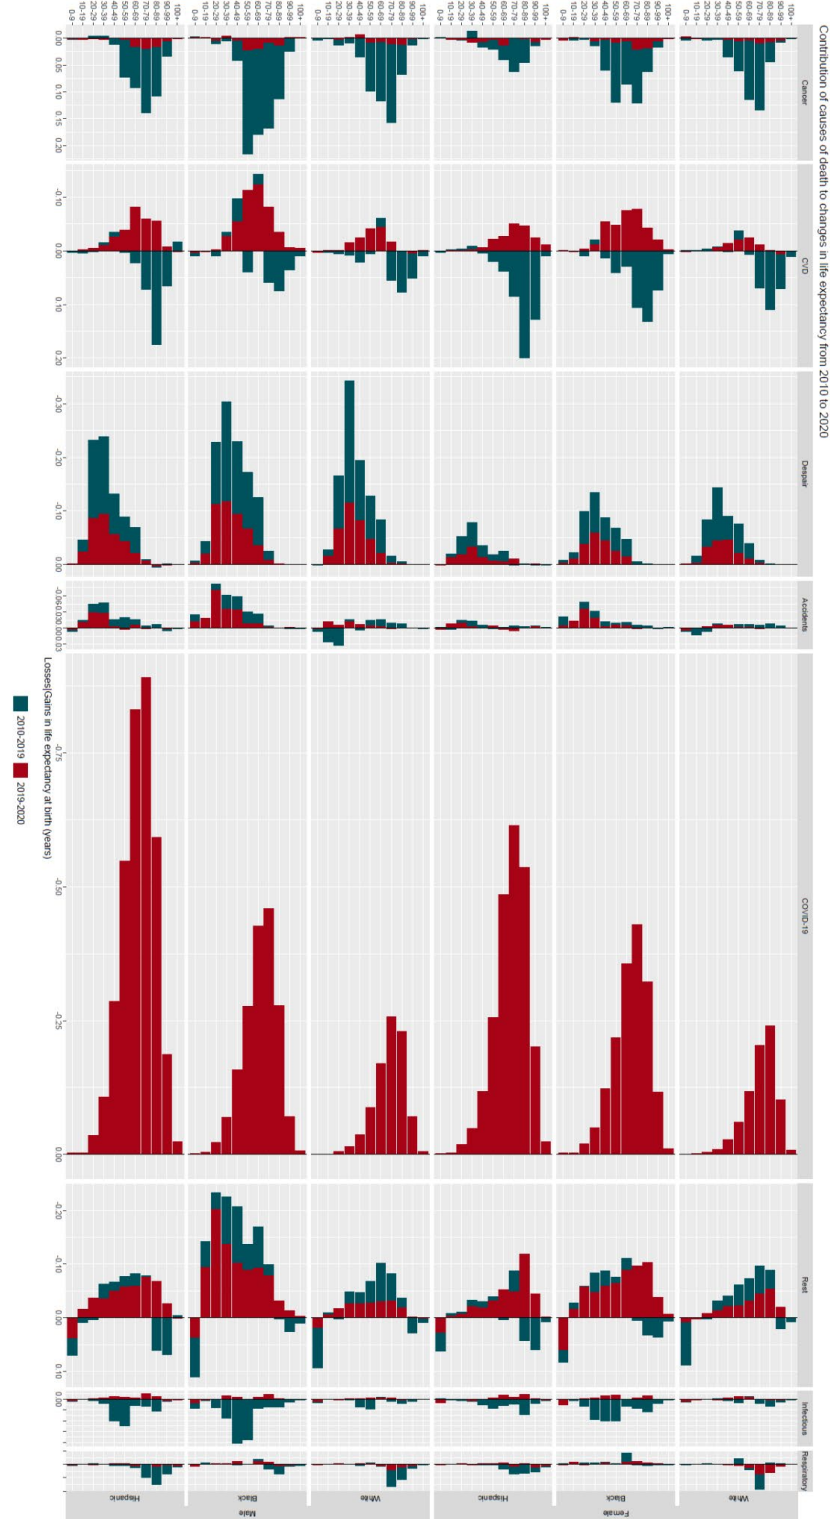

Figure S2. Contributions by causes of death to changes in life expectancy in 2010-2019 and 2019-2020 by racial/ethnic groups and sex.

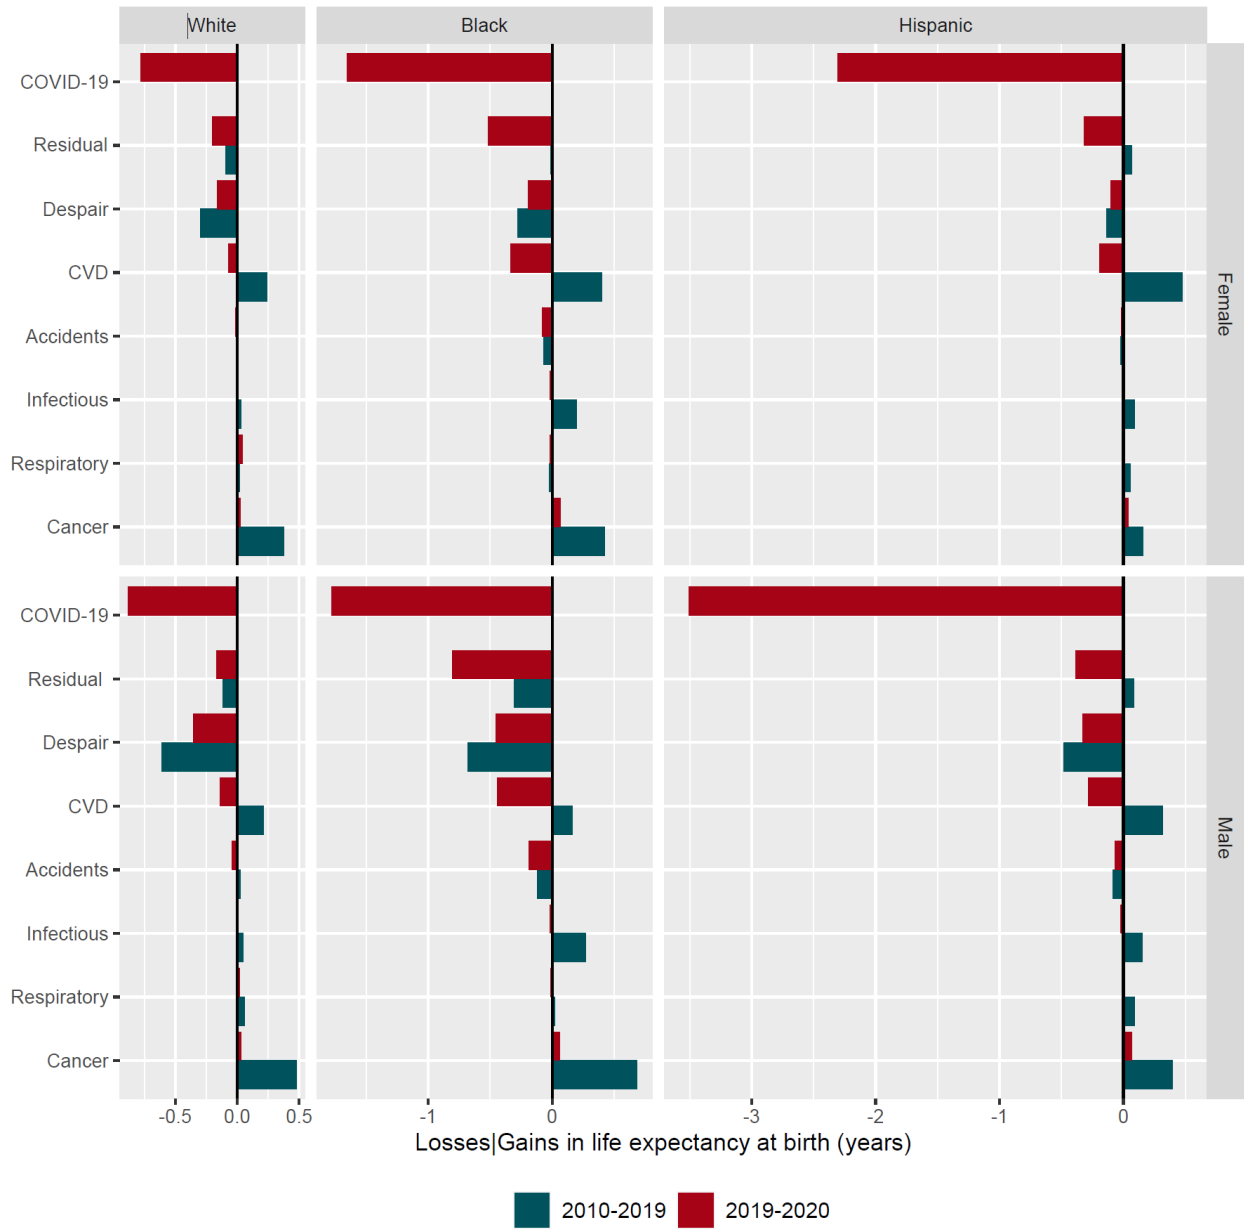

Figure S3. Contributions by causes of death to changes in lifespan inequality in 2010-2019 and 2019-2020 by racial/ethnic groups and sex.

A) Contribution of causes of death to changes in lifespan inequality from 2010 to 2020

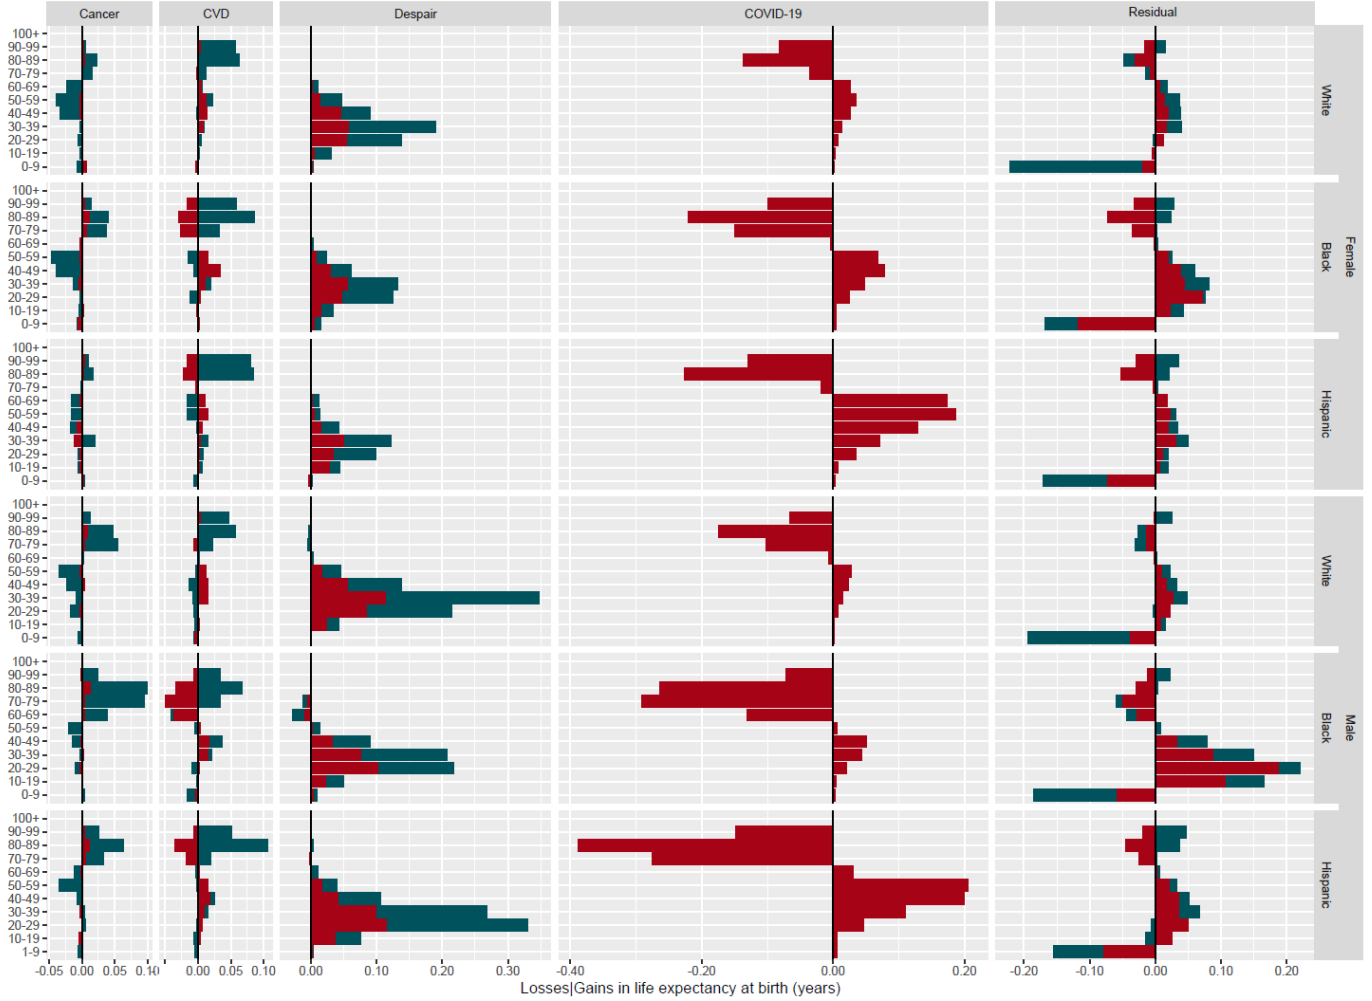

B) Total contribution by cause of death

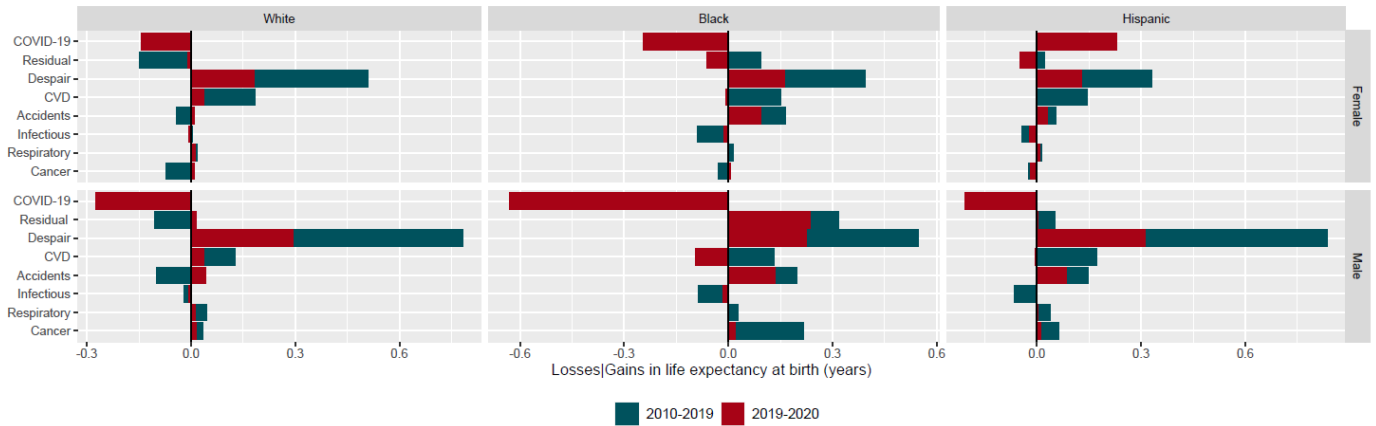

Figure S4. Results as shown in Figure 3 for Hispanic-Black difference in life expectancy.

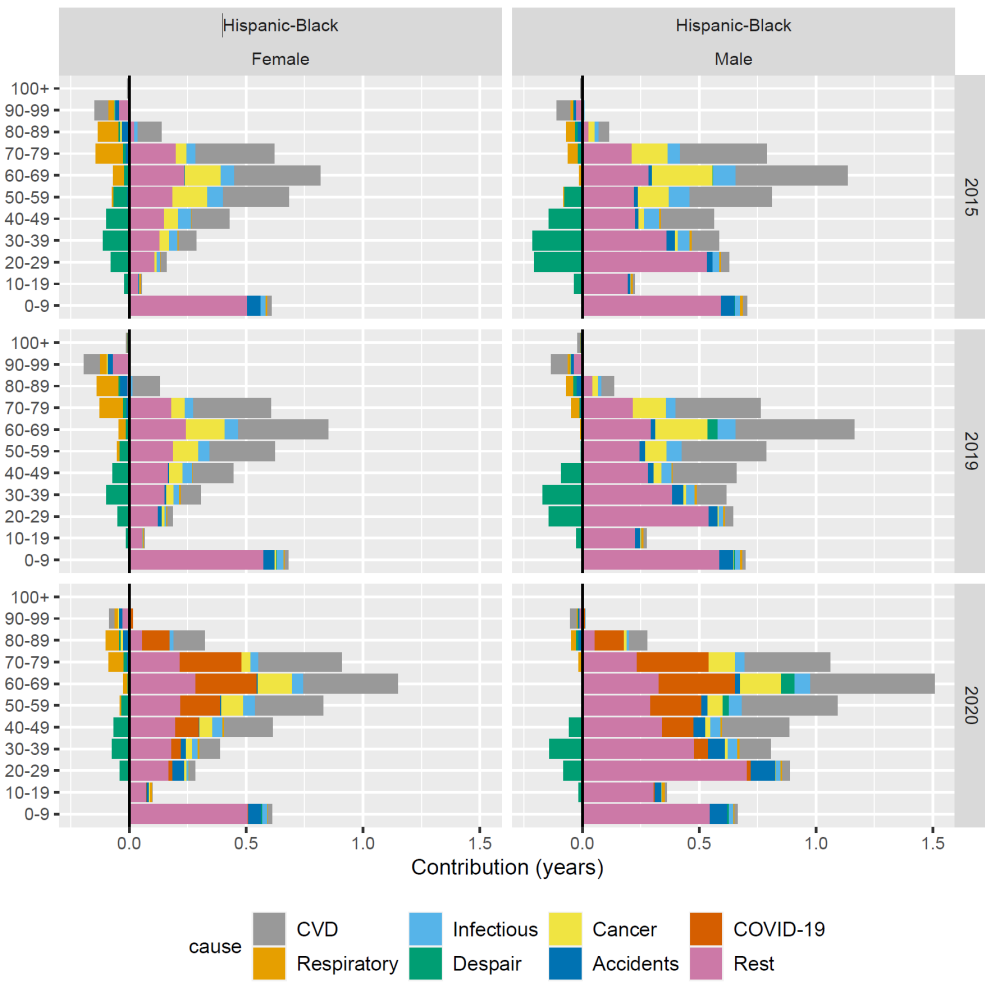

Figure S5. Contributions by causes of death to ethnic/racial gaps in life expectancy in 2015, 2019 and 2020 by sex

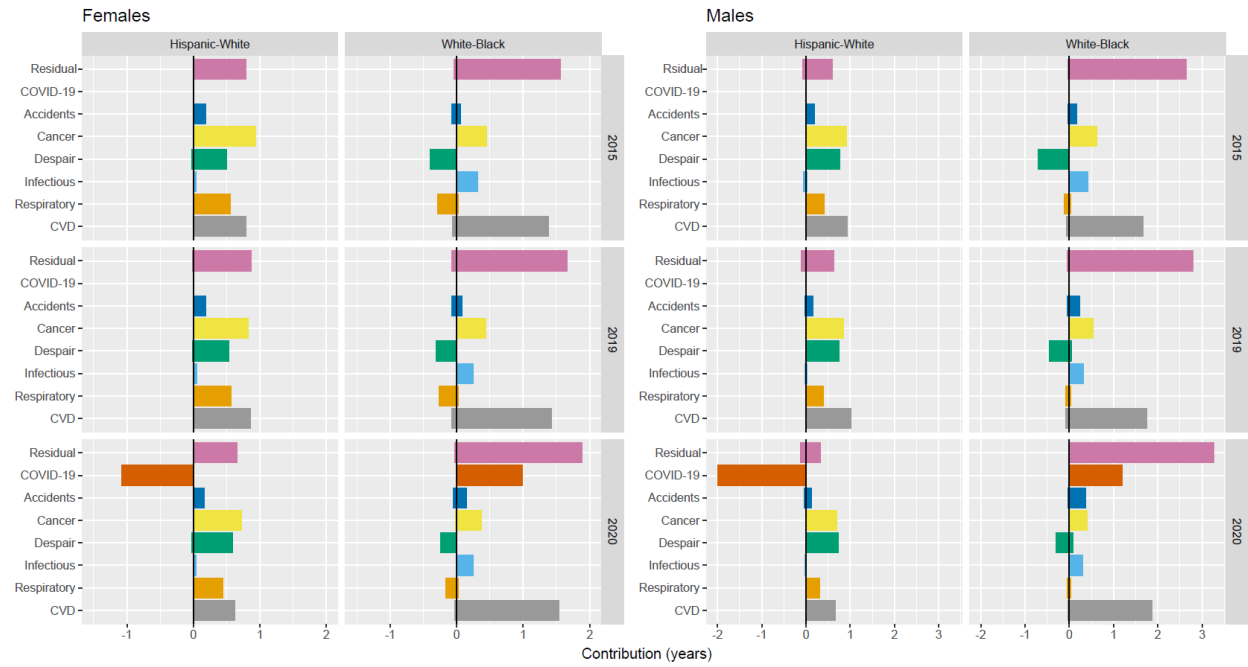

Figure S6 Contributions by age and causes of death to ethnic/racial gaps in lifespan inequality in 2015, 2019 and 2020 by sex

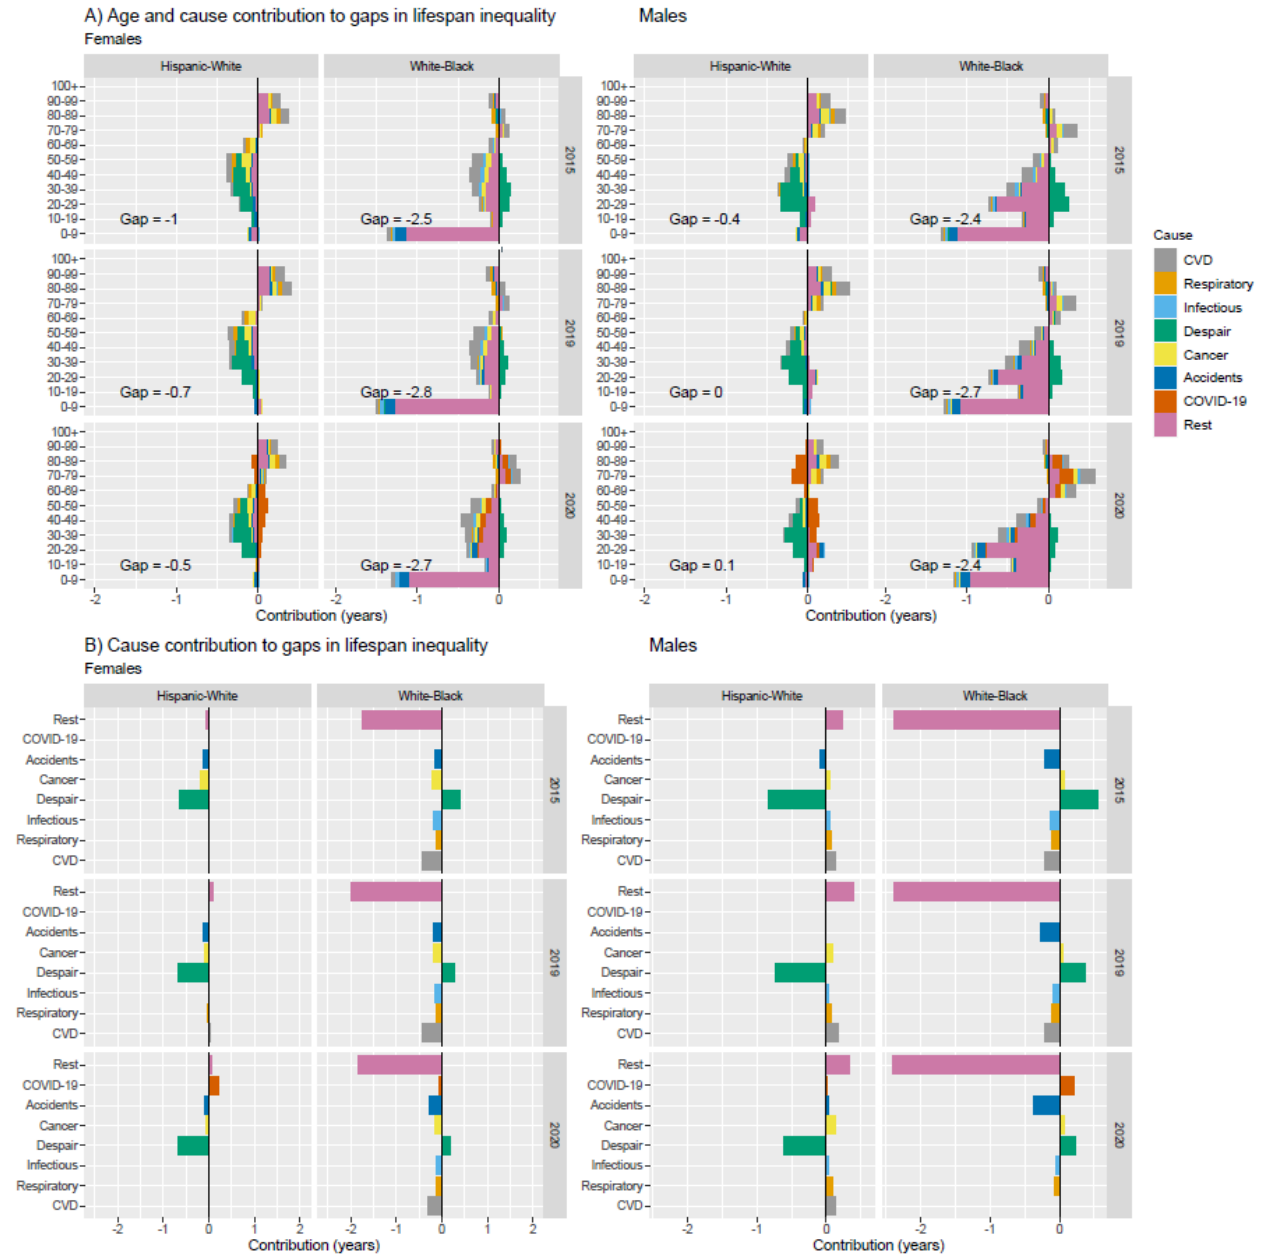

Supplement: pnas.2205813119.sapp.pdf [file pnas.2205813119.sapp.pdf]
